# Supplementary material
Source: publisher site journal article supplement (https://www.dovepress.com/article/378341)
Supplement: Supplementary file 1 [file get_supplementary_file.php]

**Supplementary Material**

**Table1** **Characteristics of Participants**

| Characteristic |  | HC | GD | AG | CG |
| --- | --- | --- | --- | --- | --- |
|  |  | n=16 | n=27 | n=15 | n=16 |
| Age (years) | Median (min, max) | 45.0 (15, 72) | 46.0 (16, 72) | 47.0 (19, 79) | 47.0 (22, 78) |
| Sex | male | 16 | 27 | 15 | 16 |
| Race | Asian | 16 | 27 | 15 | 16 |
| Disease duration (years) | Mean (SD) | 0 | 11 (9) | 10 (10) | 10 (8) |
| Serum uric acid, mg/dL | Mean (SD) | 4.8 (1.8) | 9.4 (1.7) | 9.5 (1.6) | 10.4 (1.8) |
| Flares within half a year | <6 | 0 | 11 (40.7) | 15 (100) | 0 |
|  | ≥6 | 0 | 16 (59.3) | 0 | 16 (100) |
| Tophi present |  | 0 | 10 (0.37) | 1 (6.6) | 5 (31.2) |

**Table2 RT-PCR primers**

| gene | F (5'-3') | R (5'-3') |
| --- | --- | --- |
| rat-TNFa | ATGGGCTCCCTCTCATCAGT | GCTTGGTGGTTTGCTACGAC |
| rat-IL1b | TGGCAACTGTCCCTGAACTC | AAGGGCTTGGAAGCAATCCTTA |
| rat-IL6 | GCCCACCAGGAACGAAAGTC | TGGCTGGAAGTCTCTTGCGG |
| rat-IL18 | CAGCTCTTCTACCAGCAAACAT | CTTCCAACTGAGAGGCTGTGC |
| rat-Ifn-γ | TGTCATCGAATCGCACCTGA | TGTGGGTTGTTCACCTCGAA |
| rat-nlrp3 | GTCACCATGGGTTCTGGTCA | GGGCTTAGGTCCACACAGAA |
| rat-casp1 | GAAACGCCATGGCTGACAAG | CATGATCGCACAGGTCTCGT |
| rat-asc | GGCACAGCCAGAACAGAACA | ACAGAGCATCCAGCAAACCA |
| rat-ninj1 | GAGGAGTACGAGCTCAACGG | CAGCGGGGTGGCGAG |
| rat-Actb | ACCCGCCACCAGTTCGC | CACGATGGAGGGGAAGACG |
| human-gapdh | GGAGCGAGATCCCTCCAAAAT | GGCTGTTGTCATACTTCTCATGG |
| human-ninj1 | TCAAGTACGACCTTAACAACCC | TGAAGATGTTGACTACCACGATG |
